# Supplementary material for: From wheat bran derived carbonaceous materials to a highly stretchable and durable strain sensor
Source: Royal Society of Chemistry journal article supplement (doi:10.1039/c7ra01837a), 2017-01-01
Supplement: c7ra01837a1.pdf [file c7ra01837a1.pdf]

## **Electronic Supplementary Material**

# **From Wheat Bran Derived Carbonaceous Materials to Highly Stretchable and Durable Strain Sensor**

Jing Ren, Xuan Du, Wenjun Zhang, and Ming Xu\*

State Key Laboratory of Materials Processing and Die & Mould Technology

School of Materials Science and Engineering

Huazhong University of Science and Technology

Wuhan, 430074, China

E-mail: [ming.xu@hust.edu.cn](mailto:ming.xu@hust.edu.cn)

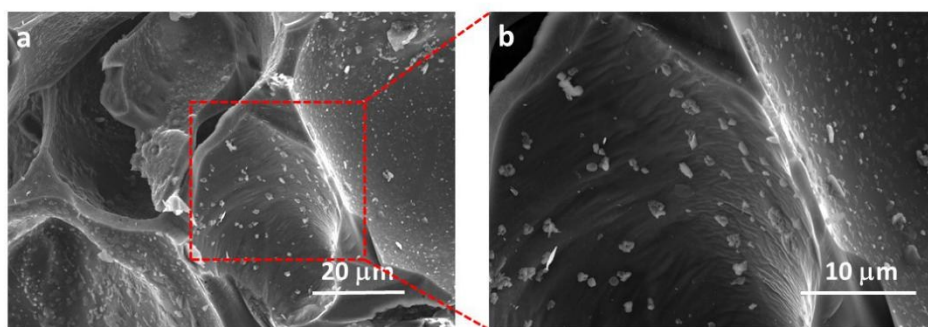

**Fig. S1.** SEM images of carbonized wheat bran processed by high-temperature carbonization ( $\sim 600$  °C).

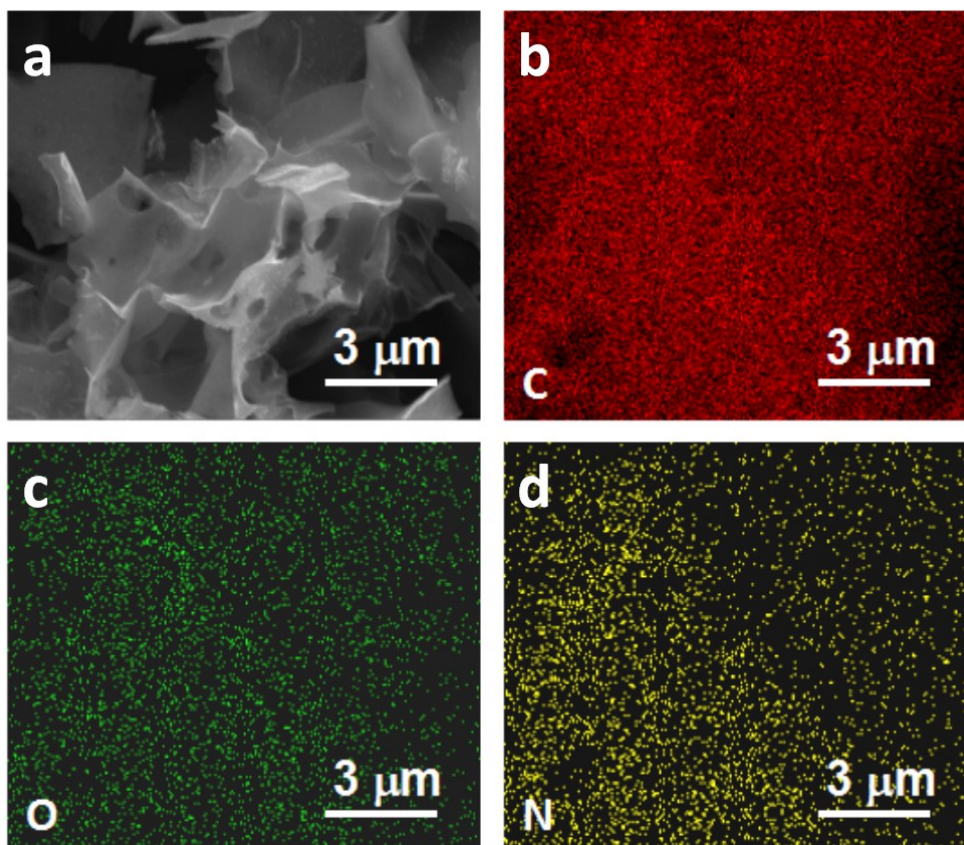

**Fig. S2.** (a) SEM image of carbon fragments. (b-d) Elements C, O and N mapping of carbon fragments.

The existence and uniform distribution of C, O and N was observed in the surface of carbon fragments, indicating that the N were successfully incorporation onto the carbon fragments through the self-doping process.

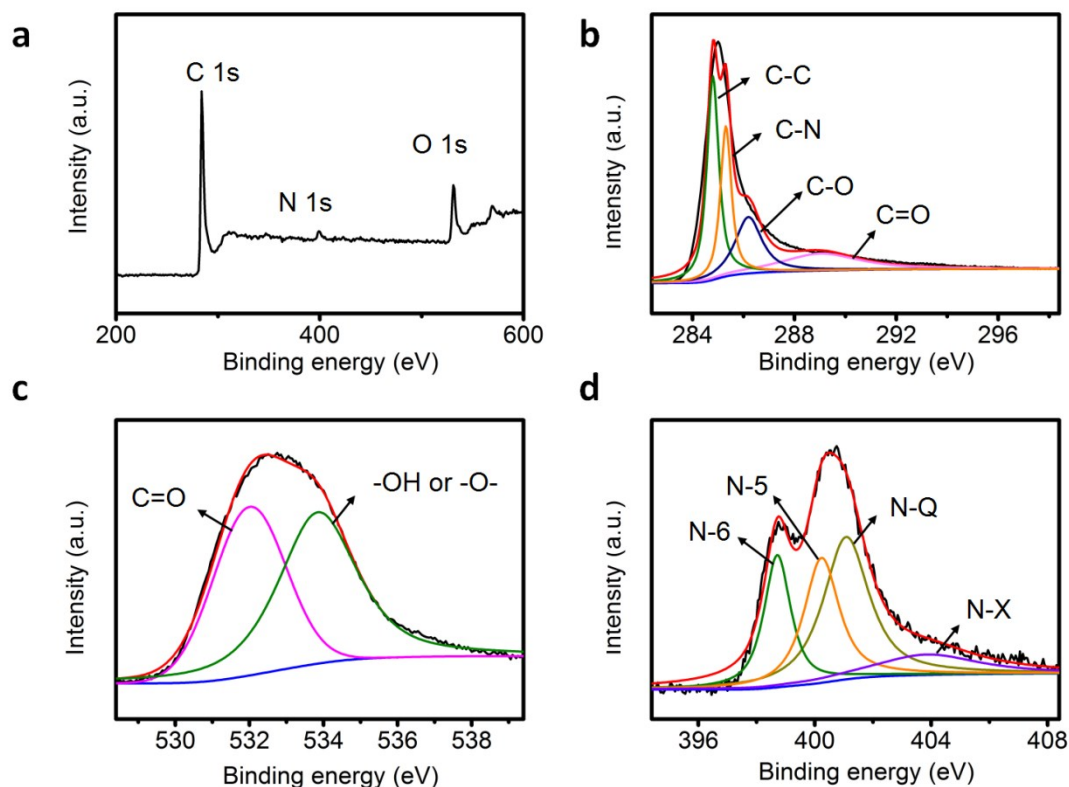

**Fig. S3.** (a) Wide-scan XPS spectrum and high-resolution XPS spectra of (b) C 1s, (c) O 1s, and (d) N 1s of carbonized wheat bran.

X-ray photoelectron spectroscopy (XPS) measurement was performed to further study the chemical state of the heteroatoms in the carbon fragments. The XPS survey spectra of the carbon fragments confirm the presence of C, O, and N elements. The content of C, O, N in carbon fragments are 82.57 at.%, 12.68 at.% and 4.74 at.%, respectively (Fig. S3a). As shown in Fig. S3b, the high-resolution C1s spectrum is deconvoluted into four individual component peaks, corresponding to C=C (284.8 eV), C-N (285.3 eV), C-O (286.8 eV), and C=O (289.4 eV). Furthermore, the deconvoluted spectra for O1s (Fig. S3c) with two binding energies of 532.0 eV and 533.8 eV are assigned to C=O groups and C-OH groups, respectively. The hydrophilic oxygen-containing functional groups on the surface improved its uniform dispersion in the polar solvent. In addition, the N1s spectrum of the carbon fragments can be fitted

by four peaks: N-6 at 398.7 eV (attributed to pyridinic N), N-5 at 400.2 eV (attributed to pyrrolic N), N-Q at 401.1 eV (attributed to quaternary or graphitic N), and N-X at 403.8 eV (attributed to pyridine-N-oxide N), indicating the transformation of part of N elements within the wheat bran into N functional groups in carbon fragments. The nitrogen-containing functional groups contributes to the good electrical conductivity of the obtained carbon fragments (Fig. S3d).

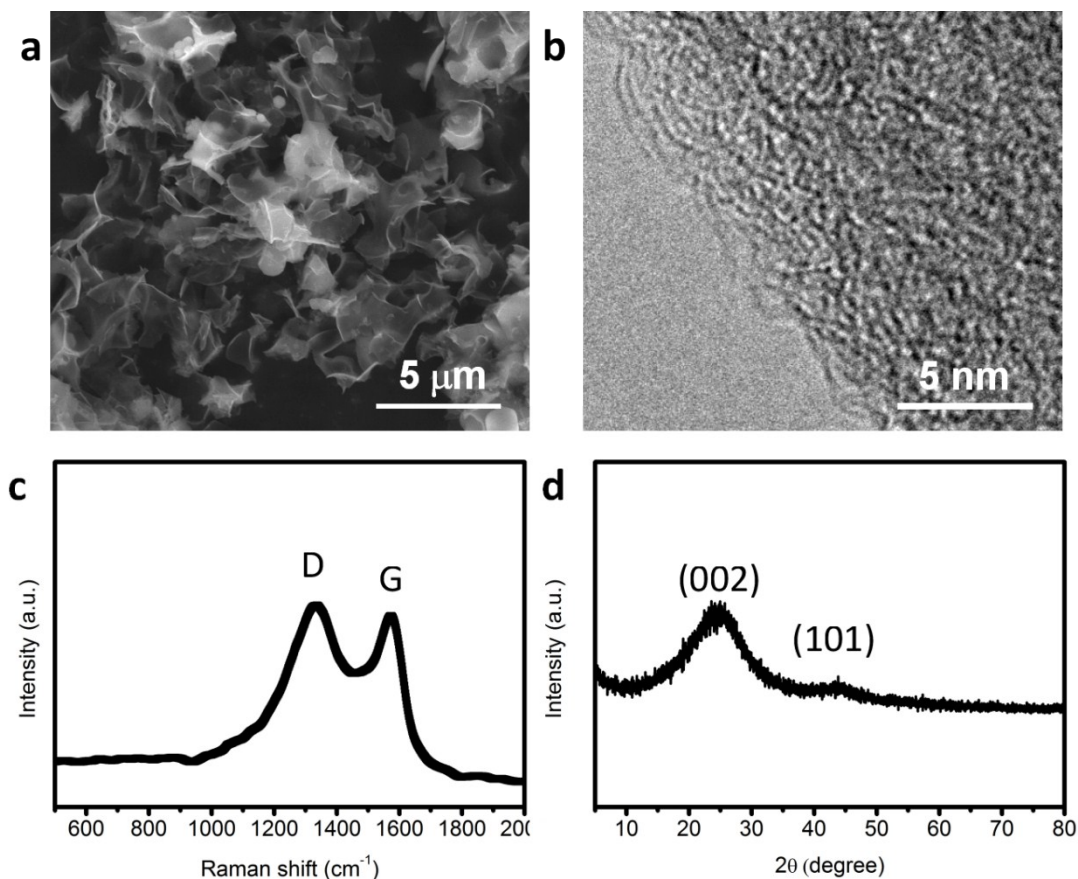

**Fig. S4.** (a) SEM image of the carbon fragments after KOH activation. (b) High resolution TEM image of the carbon fragments. (c) Raman spectra and (d) XRD pattern of carbon fragments.

The Raman spectrum of the porous carbon presents a G band at  $1593\text{ cm}^{-1}$  (associated with crystalline  $\text{sp}^2$  carbon) and a D band at  $1352\text{ cm}^{-1}$  (related to defects) (Fig. S4c). The intensity ratio ( $I_G/I_D$ ) can be used to evaluate the degree of graphitic in the carbon samples. The  $I_G/I_D$  ratio is calculated to be 0.99 for porous carbon, indicating the characteristic of highly graphitization of carbon materials. The graphitization degree of as-prepared samples was also estimated by the X-ray diffraction (XRD) patterns. As seen in Fig. S4d, the XRD analysis shows two peaks at  $26^\circ$  and  $43^\circ$ , corresponding to the (002) and (101) planes of graphite, indicating the graphitization nature of carbon.



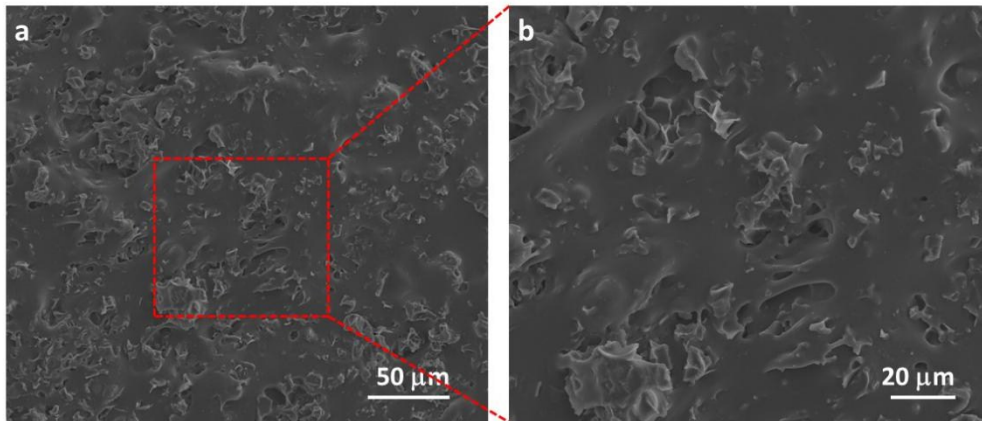

**Fig. S5.** SEM images of the surface of the strain sensor.

When the strain sensor was peeled off from the glass slide, a few pieces of the carbon fragments on the top surface of the film were exposed to air, which facilitated the electrical wiring process.

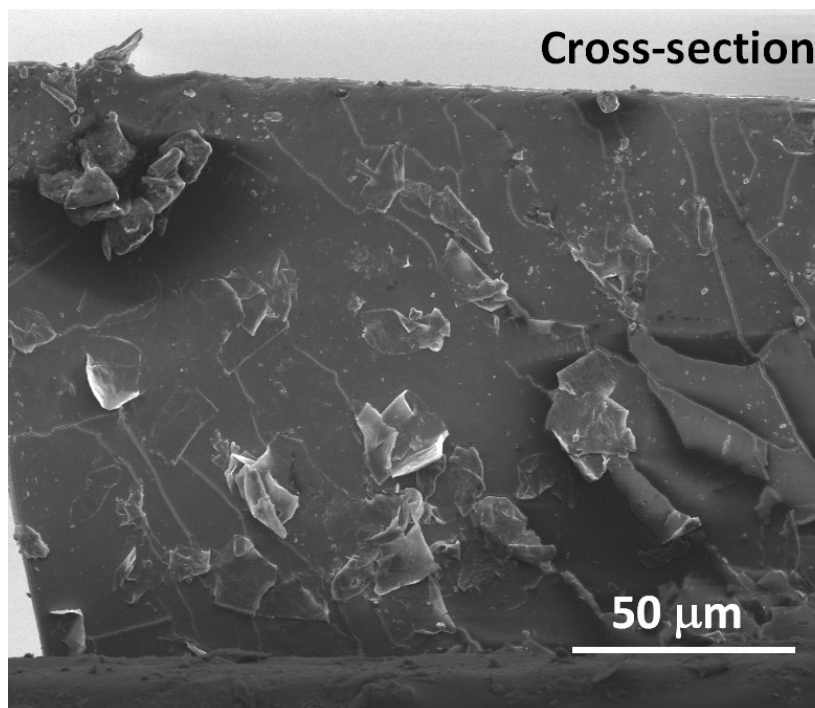

**Fig. S6.** The SEM image of the cross-section of the strain sensor.

The SEM image of the cross-section of the strain sensor indicated that the carbon fragments could be fully embedded in the PDMS matrix.

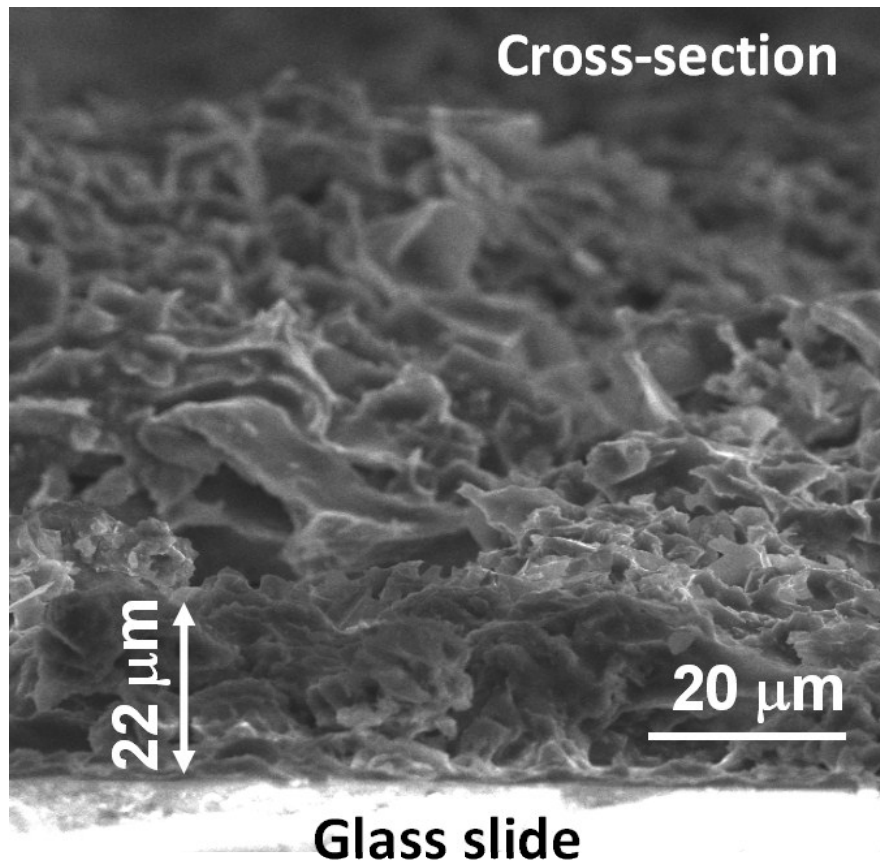

**Fig. S7.** The SEM image of the cross-section of the carbon fragments film.



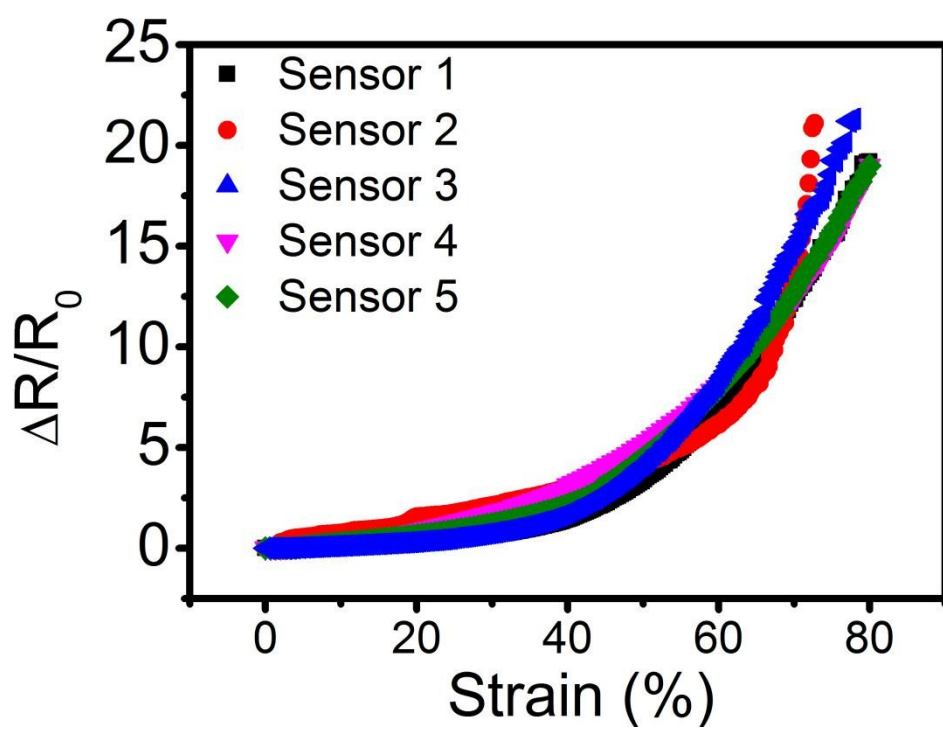

Fig. S8. The relative resistance change of five strain sensors as a function of strain.

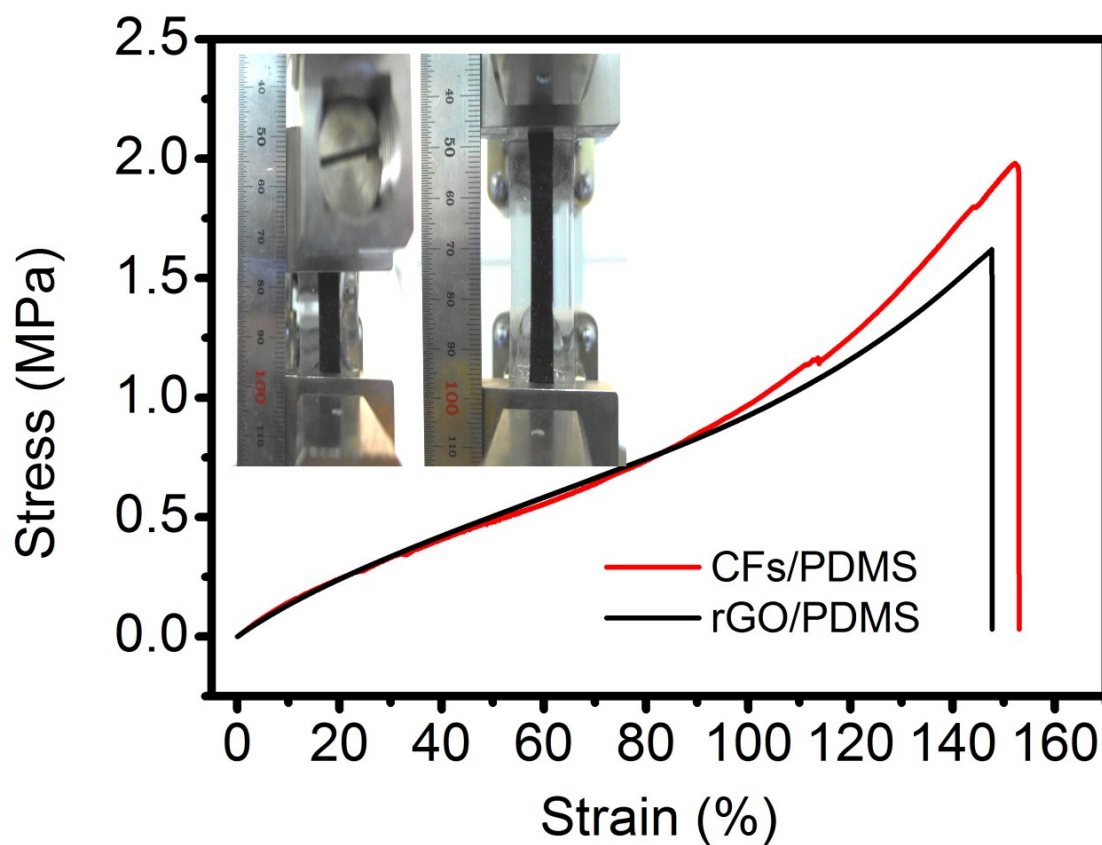

**Fig. S9.** The tensile stress-strain curves of the two strain sensors. The inset shows the photographs of the CFs/PDMS before and after stretching of  $\epsilon = 153\%$ .

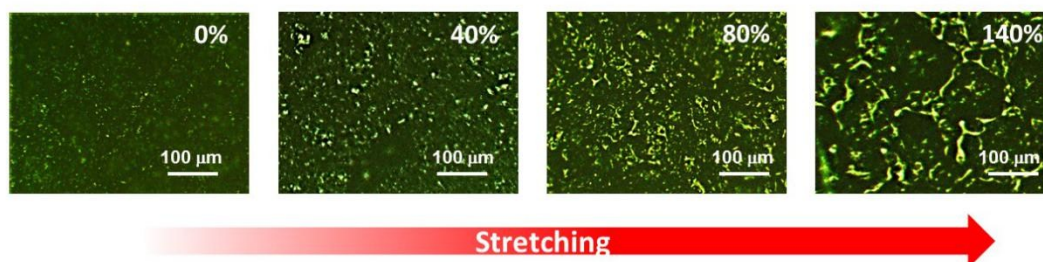

**Fig. S10.** Optical images of the CFs/PDMS surface morphology at various stretching states.

At 0% strain, the optical images showed the continuous conductive pathways, indicated by the low light transmission. When being stretched to 40% and 80%, the bright spots were gradually produced which were attributed to the separation of neighboring carbon fragments. Finally, these spots were connected to form cracks when being stretched to 140% strain.

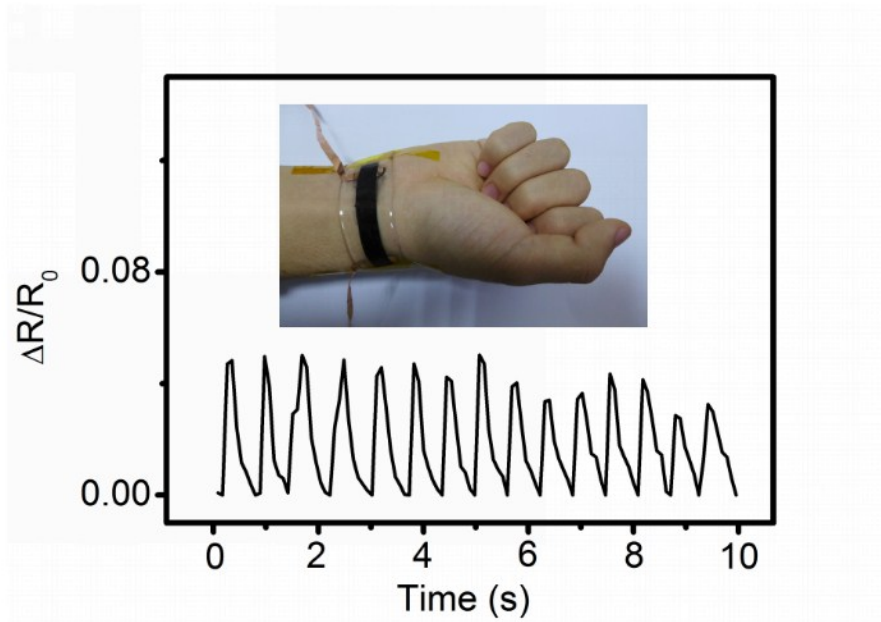

**Fig. S11.** Demonstration of strain sensor for human movements monitoring. The relative resistance changes of the strain sensor versus time for human wrist pulse detection.

As vital signs, wrist pulse is important to be detected for personal health. The wrist pulse numbers were 15 within 10 s and the data was within the normal range of a healthy adult.

**Table S1.** Comparison of main performance of the carbon-based stretchable strain sensors.

| Raw materials    | Strain sensors                                | Maximum strain | Gauge factor                                                      | Durability                   | Response time and recovery time                                                                | Frequency range             | Reference                                                               |
|------------------|-----------------------------------------------|----------------|-------------------------------------------------------------------|------------------------------|------------------------------------------------------------------------------------------------|-----------------------------|-------------------------------------------------------------------------|
| Biomass material | Tissue Paper/PDMS                             | 20%            | 25.3 (< 3% strain); 9.6 (3%-20% strain);                          | 1,000 cycles at 3% strain    | Not shown                                                                                      | 0.01-1 Hz at 3% strain      | Y. Li <i>et al.</i> , <i>ACS Sustainable Chem. Eng.</i> 2016. (Ref. 27) |
|                  | Carbonized Silk Fabric/Ecoflex                | 500%           | 5.8 (< 1% strain); 9.6 (1%-250% strain); 37.5 (250%- 500% strain) | 10,000 cycles at 300% strain | response time: 70 ms<br>recovery time: 2 s (100%strain); 6 s (200%strain); 9 s (300% strain)   | 0.026-1.25 Hz at 10% strain | C. Wang <i>et al.</i> , <i>Adv. Mater.</i> 2016. (Ref. 29)              |
|                  | Carbonized cotton Fabric/Ecoflex              | 140%           | 25 (< 80% strain); 64 (80%- 140% strain)                          | 2,000 cycles at 50% strain   | Not shown                                                                                      | 0.05-0.25 Hz at 50% strain  | Y. Zhang <i>et al.</i> , <i>Adv. Funct. Mater.</i> 2016. (Ref. 28)      |
| Graphene         | Fish Scale-Like Graphene/PDMS                 | 82%            | 16.2 (< 60% strain); 150 (60%-82% strain)                         | 5,000 cycles at 10% strain   | Not shown                                                                                      | Not shown                   | Q. Liu <i>et al.</i> , <i>ACS Nano</i> 2016. (Ref. 18)                  |
|                  | Graphene/Rubber                               | 800%           | 35                                                                | 1,000 cycles at 100% strain  | Not shown                                                                                      | Not shown                   | C. S. Boland <i>et al.</i> , <i>ACS Nano</i> 2014. (Ref. 19)            |
|                  | Graphene– Nanocellulose Nanopaper/PDMS        | 100%           | 1.6 (10% strain); 7.1 (100% strain)                               | Not shown                    | Not shown                                                                                      | Not shown                   | C. Yan <i>et al.</i> , <i>Adv. Mater.</i> 2014. (Ref. 15)               |
|                  | Fragmentized Graphene Foam/PDMS               | 70%            | 15-29                                                             | 10,000 cycles at 50% strain  | Not shown                                                                                      | Not shown                   | Y. R. Jeong <i>et al.</i> , <i>Adv. Funct. Mater.</i> 2015. (Ref. 20)   |
| Carbon nanotube  | Carbon nanotube film/PDMS                     | 280%           | 0.82 (40% strain); 0.06 (60-200% strain)                          | 10,000 cycles at 200% strain | response time: 14 ms<br>recovery time: 5 s (100% strain)                                       | Not shown                   | T. Yamada <i>et al.</i> , <i>Nat. Nanotechnol.</i> 2011. (Ref. 38)      |
|                  | Carbon nanotube meshes/PDMS                   | 15%            | 4                                                                 | 1,000 cycles at 20% strain   | Not shown                                                                                      | Not shown                   | F. M. <i>et al.</i> , <i>Nanoscale</i> , 2016. (Ref. 13)                |
| Carbon black     | Carbon black/ Thermoplastic elastomer         | 100%           | 20                                                                | 3,800 cycles at 80% strain   | recovery time: 100 s (100% strain)                                                             | Not shown                   | C. Mattmann <i>et al.</i> <i>Sensors</i> , 2008 (Ref. 39)               |
| Biomass material | Carbon Fragments Derived from Wheat Bran/PDMS | 153%           | 2.2 (<40% strain); 62.8(40%-80% strain)                           | 10,000 cycles at 80% strain  | response time: ~60 ms<br>recovery time: 3 s (40% strain); 7 s (60% strain) ; 10 s (80% strain) | 0.01-1 Hz at 80% strain     | Our work                                                                |
